# Supplementary material
Source: publisher site journal article supplement (https://www.spandidos-publications.com/349/downloadSupplementary)

Figure S1. LY364947 inhibits TGF- $\beta$ 1-induced p16 and p21 expression in PDLSCs. (A) mRNA and (B and C) protein expression levels of p16 and p21 in PDLSCs treated with TGF- $\beta$ 1 (10 ng/ml) alone, or in combination with 2  $\mu$ M LY364947, for 48 h. Results are presented as mean  $\pm$  standard deviation. \*\*P<0.01, with comparisons indicated by lines. Data are representative of three independent experiments. PDLSCs, periodontal ligament stem cells; TGF- $\beta$ 1, transforming growth factor- $\beta$ 1.

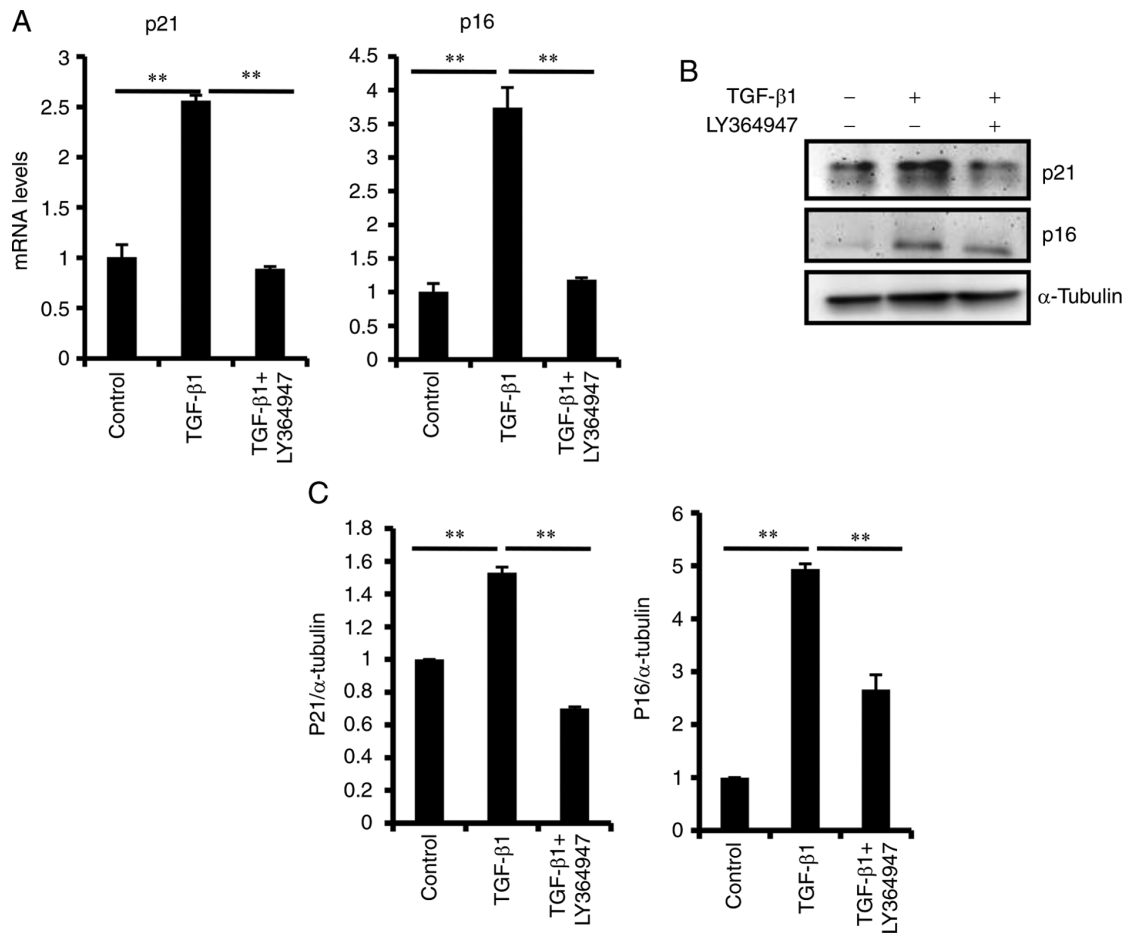

Supplement: Supplementary file 1 [file downloadSupplementary]
